# Supplementary material
Source: PubMed Central journal article supplement (PMC3794677)
Supplement: 10.3163.1536-5050.101.4.003.sg001.pdf [file 10.3163.1536-5050.101.4.003.sg001.pdf]

**Student peer assessment in evidence-based medicine searching skills training: an experiment**

Jonathan D. Eldredge, PhD, AHIP; David G. Bear, PhD; Sharon J. Wayne, MPH; Paul P. Perea, MA

**APPENDIX**

**Anonymous student peer assessment rubric**

Unique four-digit number of *colleague* assessed \_\_\_\_ \_ \_ \_

Disease/condition topic colleague selected \_\_\_\_\_

**Diagnosis question:**

| <b>Activity</b>                                                             | <b>Correct?</b> |
|-----------------------------------------------------------------------------|-----------------|
| Found the PubMed link                                                       | Y               |
| Began with the Medical Subject Headings (MeSH) database                     | Y               |
| Selected appropriate MeSH term, based on definition                         | Y               |
| Selected the most appropriate subheading                                    | Y               |
| Restricted to MeSH major topic                                              | Y               |
| Applied search strategy to PubMed                                           | Y               |
| Limited to human                                                            | Y               |
| Limited to English-language                                                 | Y               |
| Limited to appropriate article type (indicate):                             | Y               |
| If appropriate, applied other limits (filters):                             | Y               |
| Did <i>not</i> limit to:                                                    |                 |
| • Male or female gender                                                     | Y               |
| • Anything in subjects filter                                               | Y               |
| • Links to free full text                                                   | Y               |
| • Added to PubMed in the last (published time period)                       | Y               |
| Retrieved between 5 and 60 references when all relevant limits were applied | Y               |
| Printed out history—and labeled it so you could follow it                   | Y               |

Score (one point per “yes”) = \_\_\_\_\_ (16 possible points)

Suggestions for improvement:

---

**Treatment question:**

| Activity                                                                    | Correct? |
|-----------------------------------------------------------------------------|----------|
| Found the PubMed link                                                       | Y        |
| Began with the MeSH database                                                | Y        |
| Selected appropriate MeSH term, based on definition                         | Y        |
| Selected the most appropriate subheading by treatment type (print term):    | Y        |
| Restricted to MeSH major topic                                              | Y        |
| Applied search strategy to PubMed                                           | Y        |
| Limited to human                                                            | Y        |
| Limited to English-language                                                 | Y        |
| Limited to appropriate article type (indicate):                             | Y        |
| If appropriate, applied other limits (filters):                             | Y        |
| Did <i>not</i> limit to:                                                    |          |
| • Male or female gender                                                     | Y        |
| • Anything in subjects filter                                               | Y        |
| • Links to free full text                                                   | Y        |
| • Added to PubMed in the last (published time period)                       | Y        |
| Retrieved between 5 and 60 references when all relevant limits were applied | Y        |
| Printed out history—and labeled it so you could follow it                   | Y        |

Score (one point per “yes”) = \_\_\_\_\_ (16 possible points)

Suggestions for improvement:

---

**Prognosis question:**

| Activity                                                                          | Correct? |
|-----------------------------------------------------------------------------------|----------|
| Found the PubMed link                                                             | Y        |
| Began with the MeSH database                                                      | Y        |
| Selected appropriate MeSH term, based on definition                               | Y        |
| Selected the most appropriate second MeSH term (prognosis or print term):         | Y        |
| Restricted to MeSH major topic, but only if it helped reduce number of references | Y        |
| Did <i>not</i> restrict prognosis (or similar term) to major heading              | Y        |
| Applied search strategy to PubMed                                                 | Y        |
| Limited to human                                                                  | Y        |
| Limited to English-language                                                       | Y        |
| Limited to appropriate article type (indicate):                                   | Y        |
| If appropriate, applied other limits (filters):                                   | Y        |
| Did <i>not</i> limit to:                                                          |          |
| • Male or female gender                                                           | Y        |
| • Anything in subjects filter                                                     | Y        |

|                                                                             |   |
|-----------------------------------------------------------------------------|---|
| • Links to free full text                                                   | Y |
| • Added to PubMed in the last (published time period)                       | Y |
| Retrieved between 5 and 60 references when all relevant limits were applied | Y |
| Printed out history—and labeled it so you could follow it                   | Y |

Score (one point per “yes”) = \_\_\_\_\_ (17 possible points)

Suggestions for improvement:

---

**Overall suggestions for improvement:**

---

Overall score (tally three tables sums) = \_\_\_\_\_

Four-digit number of student colleague *completing* this assessment \_\_\_\_ \_

Return this completed student peer assessment to Paul Perea at [ppperea@salud.unm.edu](mailto:ppperea@salud.unm.edu).

Copyright © 2012, Jon Eldredge, PhD, AHIP, University of New Mexico. Health Sciences Library and Informatics Center; 505.272.2311
